# Supplementary material
Source: PubMed Central journal article supplement (PMC4965586)
Supplement: 10.1074_M116.730531_jbc.M116.730531-1.pdf [file 10.1074_M116.730531_jbc.M116.730531-1.pdf]

Supporting Information for  
Protein–Protein Interactions, not Substrate Recognition, Dominates the Turnover of Chimeric Assembly  
Line Polyketide Synthases

Maja Klaus<sup>a</sup>, Matthew P. Ostrowski<sup>a</sup>, Jonas Austerjost<sup>a</sup>, Brian Lowry<sup>a</sup>, Thomas Robbins<sup>a</sup>,

David E. Cane<sup>b</sup>, Chaitan Khosla<sup>\*a</sup>

<sup>a</sup> Departments of Chemistry and Chemical Engineering and Stanford ChEM-H, Stanford University, Stanford, CA 94305

<sup>b</sup> Department of Chemistry, Box H, Brown University, Providence, RI 02192-9108

\* Corresponding author: [khosla@stanford.edu](mailto:khosla@stanford.edu)

Running title: Role of ACP-KS interactions in chimeric PKSs

**Table S1.** Plasmids used for module library

| PKS product    | Cosmid    | Module number  | Primer Name  | Primer Sequence                | Resulting plasmid                |       |
|----------------|-----------|----------------|--------------|--------------------------------|----------------------------------|-------|
| Rifamycin      | cos2      | 1              | RifM1_N-Term | CCGGGCTGAGCTCCTCGGGATC         | pAJ5                             |       |
|                |           |                | RifM1_C-Term | GTCGGCGGGGAACTCGGTGAC          |                                  |       |
|                | cos2      | 2              | RifM2_N-Term | CCTGTCCCCGGCGATGATCTTC<br>G    | pAJ6                             |       |
|                |           |                | RifM2_C-Term | GGTCCGGGTGGTAGAGGCCGTC         |                                  |       |
|                | cos2      | 3              | RifM3_N-Term | CGTGGAGCTGCCAGCACCC            | pAJ7                             |       |
|                |           |                | RifM3_C-Term | GCGCGCTGTTCTCCTGCTGAAG<br>C    |                                  |       |
|                | cos2      | 5              | RifM5_N-Term | GGCGAGACGGTGGCGGGTG            | pAJ9                             |       |
|                |           |                | RifM5_C-Term | GTCGGGAAGCTCGACACCGCG          |                                  |       |
|                | cos42     | 6              | RifM6_N-Term | CCGCCACCGCCTGAAGCTG            | pAJ10                            |       |
|                |           |                | RifM6_C-Term | GCCACCAGCCGCCAGAGGTCA<br>C     |                                  |       |
|                | cos42     | 7              | RifM7_N-Term | GACGCGGGCGAGGAGCGGTC           | pAJ11                            |       |
|                |           |                | RifM7_C-Term | GCGATGGCCCGCTTGAGGTAGT<br>CG   |                                  |       |
|                | Rapamycin | KOS002-13 "B1" | 4            | RapM4_N-Term                   | GAGTTGTTACCGGCGAGAACC<br>CTGC    | pAJ16 |
|                |           |                |              | RapM4_C-Term                   | CCCGGAACTTGTC AATCGAGAT<br>CCCCG |       |
| KOS002-13 "B1" |           | 6              | RapM6_N-Term | CGACGGCTTTGGCTGTTTCGGCT<br>G   | pAJ18                            |       |
|                |           |                | RapM6_C-Term | GCATCCGTACCCGACTCGACCA<br>AACG |                                  |       |

**Table S2.** Plasmid design and primers for bimodular chimeric PKSs

| Plasmid Encoded Protein | PCR Fragment | Primer Name            | Primer Sequence                                 | PCR Template |
|-------------------------|--------------|------------------------|-------------------------------------------------|--------------|
| pAJ20<br>(3)RifM1-TE    | RifM1        | bi_RifM1_Insert_N-Term | GCATCCGCGAGCTGGAATCCGA<br>GCCGATCGCGATCGTGG     | pAJ5         |
|                         |              | bi_RifM1_Insert_C-Term | TCCCGGGCGGGAGTCCCGCTGA<br>AGAGCTTGGCGCGCAGGT    |              |
|                         | (3)pET28-TE  | bi_RifM1_Vector_N-Term | ACCTGCGCGCCAAGCTCTTCAG<br>CGGGACTCCCGCCCC       | pBL16        |
|                         |              | bi_RifM1_Vector_C-Term | CCACGATCGCGATCGGCTCGGA<br>TTCCAGCTCGCGGATGC     |              |
| pAJ21<br>(3)RifM2-TE    | RifM2        | bi_RifM2_Insert_N-Term | GCATCCGCGAGCTGGAATCCGA<br>GCCGATCGCGATCGTGC     | pAJ6         |
|                         |              | bi_RifM2_Insert_C-Term | TCCCGGGCGGGAGTCCCGCTGA<br>GCAGTTCGGCCCCGAGG     |              |
|                         | (3)pET28-TE  | bi_RifM2_Vector_N-Term | CCTGCGGGCCGAAGTCTCAGC<br>GGGACTCCCGCCCC         | pBL16        |
|                         |              | bi_RifM2_Vector_C-Term | CGACGATCGCGATCGGCTCGGA<br>TTCCAGCTCGCGGATGC     |              |
| pAJ22<br>(3)RifM3+TE    | RifM3        | bi_RifM3_Insert_N-Term | GCATCCGCGAGCTGGAATCCGA<br>GCCGATCGCGATCGTGC     | pAJ7         |
|                         |              | bi_RifM3_Insert_C-Term | TCCCGGGCGGGAGTCCCGCTCA<br>GGAGTTCGACGCGCAGGTAGC |              |
|                         | (3)pET28-TE  | bi_RifM3_Vector_N-Term | GCTACCTGCGCGTCAACTCCT<br>GAGCGGGACTCCCGCCCC     | pBL16        |
|                         |              | bi_RifM3_Vector_C-Term | CGACGATCGCGATCGGCTCGGA<br>TTCCAGCTCGCGGATGC     |              |
| pAJ24<br>(3)RifM5+TE    | RifM5        | bi_RifM5_Insert_N-Term | GCATCCGCGAGCTGGAATCCGA<br>GCCGATCGCCATCGTGC     | pAJ9         |
|                         |              | bi_RifM5_Insert_C-Term | TCCCGGGCGGGAGTCCCGCTAC<br>CGAGTTCGTCGCGCAGGT    |              |
|                         | (3)pET28-TE  | bi_RifM5_Vector_N-Term | ACCTGCGCGACGAAGTCTCGTAG<br>CGGGACTCCCGCCCC      | pBL16        |
|                         |              | bi_RifM5_Vector_C-Term | CGACGATGGCGATCGGCTCGG<br>ATTCCAGCTCGCGGATGC     |              |
| pAJ25<br>(3)RifM6+TE    | RifM6        | bi_RifM6_Insert_N-Term | GCATCCGCGAGCTGGAATCCGA<br>GCCGATCGCCATCGTGC     | pAJ10        |

|                      |             |                        |                                               |       |
|----------------------|-------------|------------------------|-----------------------------------------------|-------|
|                      |             | bi_RifM6_Insert_C-Term | TCCCGGGCGGGAGTCCCCTGA<br>CCAGCCGCGCGCC        |       |
|                      | (3)pET28-TE | bi_RifM6_Vector_N-Term | GGCGCGCGGCTGGTCAGCGGG<br>ACTCCCGCCCGGGA       | pBL16 |
|                      |             | bi_RifM6_Vector_C-Term | CGACGATGGCGATCGGCTCGG<br>ATTCCAGCTCGCGGATGC   |       |
| pAJ26<br>(3)RifM7+TE | RifM7-      | bi_RifM7_Insert_N-Term | GCATCCGCGAGCTGGAATCCGC<br>GGCCGGCGAGCC        | pAJ11 |
|                      |             | bi_RifM7_Insert_C-Term | TCCCGGGCGGGAGTCCCCTGG<br>CGAGTTCCGCCCGC       |       |
|                      | (3)pET28-TE | bi_RifM7_Vector_N-Term | GCGGGCGGAACTCGCCAGCGG<br>GACTCCCGCCCG         | pBL16 |
|                      |             | bi_RifM7_Vector_C-Term | GGCTCGCCGGCCGCGGATTCCA<br>GCTCGCGGATGC        |       |
| pAJ32<br>(3)RapM4+TE | RapM4       | bi_RapM4_Insert_N-Term | GCATCCGCGAGCTGGAATCCGA<br>GCCGTTGGCGATTGTGGG  | pAJ16 |
|                      |             | bi_RapM4_Insert_C-Term | TCCCGGGCGGGAGTCCCCTCA<br>ACTCGTCCAGCCGGGCG    |       |
|                      | (3)pET28-TE | bi_RapM4_Vector_N-Term | CGCCCGGCTGGACGAGTTGAGC<br>GGGACTCCCGCCCG      | pBL16 |
|                      |             | bi_RapM4_Vector_C-Term | CCCACAATCGCCAACGGCTCGG<br>ATTCCAGCTCGCGGATGC  |       |
| pAJ34<br>(3)RapM6+TE | RapM6       | bi_RapM6_Insert_N-Term | GCATCCGCGAGCTGGAATCCGA<br>GCCGCTGGCGATCGTG    | pAJ18 |
|                      |             | bi_RapM6_Insert_C-Term | TCCCGGGCGGGAGTCCCCTCA<br>ACTCGTCCAACCGAGCAGCC |       |
|                      | (3)pET28-TE | bi_RapM6_Vector_N-Term | GGCTGCTCGGTTGGACGAGTTG<br>AGCGGGACTCCCGCCCG   | pBL16 |
|                      |             | bi_RapM6_Vector_C-Term | CACGATCGCCAGCGGCTCGGAT<br>TCCAGCTCGCGGATGC    |       |

**Table S3.** Plasmid design and primers for trimodular chimeric PKSs

| Plasmid Encoded Protein | PCR Fragment | Primer Name             | Primer Sequence                                | PCR Template |
|-------------------------|--------------|-------------------------|------------------------------------------------|--------------|
| pAJ40<br>(3)RifM1(2)    | RifM1        | tri_RifM1_Insert_N-Term | GCATCCGCGAGCTGGAATCCGA<br>GCCGATCGCGATCGTGG    | pAJ5         |
|                         |              | tri_RifM1_Insert_C-Term | GCCTCCCCCGGACCTCGGTGA<br>AGAGCTTGGCGCGCAGGT    |              |
|                         | (3)pET28(2)  | tri_RifM1_Vector_N-Term | ACCTGCGCGCCAAGCTCTTCAC<br>CGAGGTCCGGGGGGAG     | pBL36        |
|                         |              | tri_RifM1_Vector_C-Term | CCACGATCGCGATCGGCTCGGA<br>TTCCAGCTCGCGGATGC    |              |
| pAJ41<br>(3)RifM2(2)    | RifM2        | tri_RifM2_Insert_N-Term | GCATCCGCGAGCTGGAATCCGA<br>GCCGATCGCGATCGTCCG   | pAJ6         |
|                         |              | tri_RifM2_Insert_C-Term | GCCTCCCCCGGACCTCGGTGA<br>GCAGTTCGGCCCGCAGG     |              |
|                         | (3)pET28(2)  | tri_RifM2_Vector_N-Term | CCTGCGGGCCGAAGTCTCACC<br>GAGGTCCGGGGGGAG       | pBL36        |
|                         |              | tri_RifM2_Vector_C-Term | CGACGATCGCGATCGGCTCGGA<br>TTCCAGCTCGCGGATGC    |              |
| pAJ42<br>(3)RifM3(2)    | RifM3        | tri_RifM3_Insert_N-Term | GCATCCGCGAGCTGGAATCCGA<br>GCCGATCGCGATCGTCCG   | pAJ7         |
|                         |              | tri_RifM3_Insert_C-Term | GCCTCCCCCGGACCTCGGTCA<br>GGAGTTCGACGCGCAGGTAGC |              |
|                         | (3)pET28(2)  | tri_RifM3_Vector_N-Term | GCTACCTGCGCGTCAACTCCT<br>GACCGAGGTCCGGGGGGAG   | pBL36        |
|                         |              | tri_RifM3_Vector_C-Term | CGACGATCGCGATCGGCTCGGA<br>TTCCAGCTCGCGGATGC    |              |
| pAJ44<br>(3)RifM5(2)    | RifM5        | tri_RifM5_Insert_N-Term | GCATCCGCGAGCTGGAATCCGA<br>GCCGATCGCCATCGTCCG   | pAJ9         |
|                         |              | tri_RifM5_Insert_C-Term | GCCTCCCCCGGACCTCGGTAC<br>CGAGTTCGTCGCGCAGGT    |              |
|                         | (3)pET28(2)  | tri_RifM5_Vector_N-Term | ACCTGCGCGACGAAGTCTCGGTAC<br>CGAGGTCCGGGGGGAG   | pBL36        |
|                         |              | tri_RifM5_Vector_C-Term | CGACGATGGCGATCGGCTCGG<br>ATTCCAGCTCGCGGATGC    |              |
| pAJ45<br>(2)RifM6(1)    | RifM6        | tri_RifM6_Insert_N-Term | GCATCCGCGAGCTGGAATCCGA<br>GCCGATCGCCATCGTCCG   | pAJ10        |

|                      |             |                         |                                           |       |
|----------------------|-------------|-------------------------|-------------------------------------------|-------|
|                      |             | tri_RifM6_Insert_C-Term | GCCTCCCCCGGACCTCGGTGACCAGCCGCGCGCC        |       |
|                      | (3)pET28(2) | tri_RifM6_Vector_N-Term | ACCTGGGCGCGCGGCTGGTCACCGAGGTCCGGGGGGAG    | pBL36 |
|                      |             | tri_RifM6_Vector_C-Term | CGACGATGGCGATCGGCTCGGATTCCAGCTCGCGGATGC   |       |
| pAJ46<br>(2)RifM7(1) | RifM7       | tri_RifM7_Insert_N-Term | GCATCCGCGAGCTGGAATCCCGGGCCGCGAGCC         | pAJ11 |
|                      |             | tri_RifM7_Insert_C-Term | GCCTCCCCCGGACCTCGGTGGCGAGTTCCGCCCCG       |       |
|                      | (3)pET28(2) | tri_RifM7_Vector_N-Term | CCTGCGGGCGGAACTCGCCACCGAGGTCCGGGGGGAG     | pBL36 |
|                      |             | tri_RifM7_Vector_C-Term | GATCGGCTCGCCGGCCGCGGATTCAGCTCGCGGATGC     |       |
| pAJ52<br>(2)RapM4(1) | RapM4       | tri_RapM4_Insert_N-Term | GCATCCGCGAGCTGGAATCCGAGCCGTTGGCGATTGTGGG  | pAJ16 |
|                      |             | tri_RapM4_Insert_C-Term | GCCTCCCCCGGACCTCGGTCAACTCGTCCAGCCGGGCG    |       |
|                      | (3)pET28(2) | tri_RapM4_Vector_N-Term | CGCCCGGCTGGACGAGTTGACCGAGGTCCGGGGGGAG     | pBL36 |
|                      |             | tri_RapM4_Vector_C-Term | CCCACAATCGCCAACGGCTCGGATTCCAGCTCGCGGATGC  |       |
| pAJ54<br>(2)RapM6(1) | RapM6       | tri_RapM6_Insert_N-Term | GCATCCGCGAGCTGGAATCCGAGCCGCTGGCGATCGTG    | pAJ18 |
|                      |             | tri_RapM6_Insert_C-Term | GGCTGCTCGGTTGGACGAGTTGACCGAGGTCCGGGGGGAG  |       |
|                      | (3)pET28(2) | tri_RapM6_Vector_N-Term | GCCTCCCCCGGACCTCGGTCAACTCGTCCAACCGAGCAGCC | pBL36 |
|                      |             | tri_RapM6_Vector_C-Term | CACGATCGCCAGCGGCTCGGATTCAGCTCGCGGATGC     |       |

**Table S4.** Plasmid design and primers for single amino acid exchanges in PKS modules

| Plasmid Encoded Protein     | Cloning Method/ Source             | Primer Name      | Primer Sequence                              | Primer Purpose                                         | PCR Template |
|-----------------------------|------------------------------------|------------------|----------------------------------------------|--------------------------------------------------------|--------------|
| pMK2<br>(3)DEBSM6+TE-S1577A | Site-directed mutagenesis          | TE-knockout.FOR  | GTGGCCGGTCACGC<br>GGCGGGGGCACTG              | TE active site knockout (FOR)                          | pBL18        |
|                             |                                    | TE-knockout.REV  | CAGTGCCCCCGCCGC<br>GTGACCGGCCAC              | TE active site knockout (REV)                          |              |
| pMK5<br>(3)RifM2+TE-S1129A  | Site-directed mutagenesis          | TE-knockout.FOR  | GTGGCCGGTCACGC<br>GGCGGGGGCACTG              | TE active site knockout (FOR)                          | pAJ21        |
|                             |                                    | TE-knockout.REV  | CAGTGCCCCCGCCGC<br>GTGACCGGCCAC              | TE active site knockout (REV)                          |              |
| pMK9<br>(3)DEBSM3+TE-S1608A | Restriction site based mutagenesis | pRSG34_EcoRI.REV | GTCGACGGAGCTCG<br>AATTCCCTCCGCCA<br>GCCAGGC  | amplification of restriction sites in TE-mutants (REV) | pRSG34       |
|                             |                                    | pRSG34_MauBI.FOR | CTGGCCGAGACCA<br>CCGCGCGCGGGGCC<br>GCTCG     | amplification of restriction sites in pRSG34 (FOR)     |              |
|                             |                                    | TE-knockout.FOR  | GTGGCCGGTCACGC<br>GGCGGGGGCACTG              | TE active site knockout (FOR)                          |              |
|                             |                                    | TE-knockout.REV  | CAGTGCCCCCGCCGC<br>GTGACCGGCCAC              | TE active site knockout (REV)                          |              |
| pMK10<br>(3)RAPM4+TE-S1801A | Restriction site based mutagenesis | pAJ32_BstBI.FOR  | AGCGACGGCCGCTT<br>CGAAGCGCCACGAC<br>TGACC    | amplification of restriction sites in pAJ32 (FOR)      | pAJ32        |
|                             |                                    | pRSG34_EcoRI.REV | GTCGACGGAGCTCG<br>AATTCCCTCCGCCA<br>GCCAGGC  | amplification of restriction sites in TE-mutants (REV) |              |
|                             |                                    | TE-knockout.FOR  | GTGGCCGGTCACGC<br>GGCGGGGGCACTG              | TE active site knockout (FOR)                          |              |
|                             |                                    | TE-knockout.REV  | CAGTGCCCCCGCCGC<br>GTGACCGGCCAC              | TE active site knockout (REV)                          |              |
| pMK11<br>(3)RAPM6+TE-S1789A | Restriction site based mutagenesis | pAJ34_BamHI.FOR  | ATGGCCGCGTCGCTG<br>GATCCGGCACGGGC<br>CGCGGAG | amplification of restriction sites in pAJ34 (FOR)      | pAJ34        |
|                             |                                    | pRSG34_EcoRI.REV | GTCGACGGAGCTCG<br>AATTCCCTCCGCCA<br>GCCAGGC  | amplification of restriction sites in TE-mutants (REV) |              |
|                             |                                    | TE-knockout.FOR  | GTGGCCGGTCACGC<br>GGCGGGGGCACTG              | TE active site knockout (FOR)                          |              |

Role of ACP-KS interactions in chimeric PKSs

|                                 |                                    |                            |                                             |                                                            |       |
|---------------------------------|------------------------------------|----------------------------|---------------------------------------------|------------------------------------------------------------|-------|
|                                 |                                    | TE-knockout.REV            | CAGTGCCCCCGCCGC<br>GTGACCGGCCAC             | TE active site knockout (REV)                              |       |
| pMK8<br>(5)DEBSM1(2)-<br>E1424K | Restriction site based mutagenesis | pBL13_BstBI.FOR            | GTCGCGACGGGGCC<br>GTTCGAACGCGTCCG<br>CAACGC | amplification of restriction sites in pBL13 (FOR)          | pBL13 |
|                                 |                                    | pBL13_EcoRI.REV            | GTCGACGGAGCTCG<br>AATTCGGATCGCCGT<br>CGAGCT | amplification of restriction sites in pBL13 (REV)          |       |
|                                 |                                    | pBL13_E1424K_DEBSM1ACP.FOR | AAAGCGCTGTTCAA<br>ACTCGTGCGCTCG             | DEBSACP1 possible chain translocation variant E1424K (FOR) |       |
|                                 |                                    | pBL13_E1424K_DEBSM1ACP.REV | CGAGCGCACGAGTT<br>TGAACAGCGCTTT             | DEBSACP1 possible chain translocation variant E1424K (REV) |       |
| pBL60<br>(3)DEBSM2+TE-S1598A    | Site-Directed Mutagenesis          | pBL60_QC_fwd               | GTGGCCGGTCACGC<br>GGCGGGGGCACTG             | TE active site knockout (FOR)                              | pBL16 |
|                                 |                                    | pBL60_QC_rev               | CAGTGCCCCCGCCGC<br>GTGACCGGCCAC             | TE active site knockout (REV)                              |       |



**Table S5.** Plasmid design and primers for KR substitution in DEBS M1

| Plasmid Encoded Protein         | Cloning Method/ Source | PCR Fragment | Primer Name      | Primer Sequence                                  | PCR Template |
|---------------------------------|------------------------|--------------|------------------|--------------------------------------------------|--------------|
| pMPO25<br>DEBS (5)M1-<br>KR2(2) | Infusion               | KR 2 insert  | KR_2 fw          | GTTTCCGCGCTG<br>CGCTGGTTCTAC<br>CGGGTCGACTG<br>G | pBL16        |
|                                 |                        |              | KR_2 rv          | TTCGGCCGCCGC<br>CTGCGGCGCGG<br>TCGTGACGAT        |              |
|                                 |                        | (5)pET 21(2) | BL13_backbone fw | CAGGCGGCGGC<br>CGAACCG                           | pBL13        |
|                                 |                        |              | BL13_backbone rv | GCGCAGCGCGG<br>AAACCTCGT                         |              |

**Table S6.** Specific activities of bimodular chimeric PKSs. Real values for bars presented in Figure 6A.<sup>b</sup>

| Acceptor module | specific activity<br>[nmol/min/mg<br>total protein] |
|-----------------|-----------------------------------------------------|
| no Module+TE    | 0.21 ± 0.09                                         |
| DEBS M2+TE      | 11.61 ± 0.77                                        |
| DEBS M3+TE      | 0.26 ± 0.05                                         |
| DEBS M5+TE      | 0.26 ± 0.05                                         |
| DEBS M6+TE      | 1.36 ± 0.12                                         |
| RIFS M1+TE      | 0.09 ± 0.02                                         |
| RIFS M2+TE      | 0.25 ± 0.05                                         |
| RIFS M3+TE      | 0.09 ± 0.04                                         |
| RIFS M5+TE      | 0.12 ± 0.06                                         |
| RIFS M6+TE      | 0.06 ± 0.03                                         |
| RIFS M7+TE      | 0.07 ± 0.02                                         |
| RAPS M4+TE      | 0.07 ± 0.02                                         |
| RAPS M6+TE      | 0.12 ± 0.04                                         |

<sup>b</sup> All initial rate data was obtained at individual PKS protein concentrations of 4 μM and non-limiting concentrations of propionyl-CoA, methylmalonyl-CoA, and NADPH. In assays containing RIFS M2+TE, malonyl-CoA was also included because this module prefers malonyl extender units, although exclusion of malonyl-CoA did not affect the turnover rate of this system. Error bars indicate averages of two measurements (each performed in triplicate).

**Table S7.** Specific activities of trimodular chimeric PKSs. Real values for bars presented in Figure 6B.<sup>c</sup>

| Acceptor module | specific activity<br>[nmol/min/mg<br>total protein] |
|-----------------|-----------------------------------------------------|
| no Module       | 0.17 ± 0.03                                         |
| DEBS M2         | 1.49 ± 0.02                                         |
| RIFS M1         | 0.10 ± 0.00                                         |
| RIFS M2         | 0.23 ± 0.01                                         |
| RIFS M3         | 0.16 ± 0.01                                         |
| RIFS M5         | 0.12 ± 0.02                                         |
| RIFS M6         | 0.10 ± 0.01                                         |
| RIFS M7         | 0.09 ± 0.00                                         |
| RAPS M4         | 0.07 ± 0.01                                         |
| RAPS M6         | 0.14 ± 0.02                                         |

<sup>c</sup>All initial rate data was obtained at individual PKS protein concentrations of 4 μM and non-limiting concentrations of propionyl-CoA, methylmalonyl-CoA, and NADPH. In assays containing RIFS M2+TE, malonyl-CoA was also included because this module prefers malonyl extender units, although exclusion of malonyl-CoA did not affect the turnover rate of this system. Error bars indicate averages of two measurements (each performed in triplicate).

**Table S8.** Specific activities of bimodular chimeric PKSs with either DEBS M1 or DEBS M1-KR2 as the upstream module. Real values for bars presented in Figure 9B.<sup>d</sup>

| Acceptor module | specific activity with DEBS M1 [nmol/min/mg total protein] | specific activity with DEBS M1-KR2 [nmol/min/mg total protein] |
|-----------------|------------------------------------------------------------|----------------------------------------------------------------|
| no Module+TE    | 0.21 ± 0.09                                                | 0.21 ± 0.09                                                    |
| DEBS M2+TE      | 12.15 ± 0.29                                               | 1.47 ± 0.02                                                    |
| DEBS M3+TE      | 0.30 ± 0.03                                                | 0.27 ± 0.01                                                    |
| DEBS M5+TE      | 0.26 ± 0.00                                                | 0.20 ± 0.00                                                    |
| DEBS M6+TE      | 1.23 ± 0.10                                                | 1.70 ± 0.04                                                    |
| RIFS M2+TE      | 0.21 ± 0.10                                                | 0.25 ± 0.01                                                    |
| RIFS M5+TE      | 0.22 ± 0.05                                                | 0.12 ± 0.02                                                    |
| RAPS M6+TE      | 0.19 ± 0.07                                                | 0.13 ± 0.02                                                    |

<sup>d</sup> All initial rate data was obtained at individual PKS protein concentrations of 4 μM and non-limiting concentrations of propionyl-CoA, methylmalonyl-CoA (and malonyl-CoA, in the case of RIFS M2+TE), and NADPH. Errors indicate averages of three measurements.

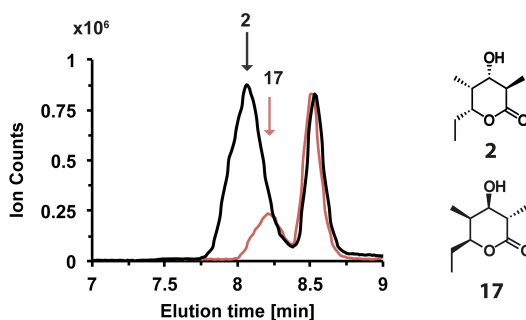

**Figure S1.** LC-MS analysis of diastereomeric triketide products. Diastereomeric triketide lactones **2** and **17** (C<sub>9</sub>H<sub>16</sub>O<sub>3</sub>, calculated MW 172.110) are distinguishable by LC-MS analysis. Lactone **2** was detected in reaction mixtures containing the reference module (DEBS (3)M2+TE), while lactone **17** was produced by self-priming of DEBS3 with methylmalonyl-CoA (1). The extracted ion chromatograms, obtained by extraction of the [M+Na]<sup>+</sup> species, are shown.

#### REFERENCES

1. Jacobsen, J. R., Cane, D. E., and Khosla, C. (1998) Spontaneous Priming of a Downstream Module in 6-Deoxyerythronolide B Synthase Leads to Polyketide Biosynthesis. *Biochemistry*. **37**, 4928–4234
